# Supplementary material for: Gamma-Range Auditory Steady-State Responses and Cognitive Performance: A Systematic Review
Source: PubMed Central journal article supplement (PMC7916793; doi:10.3390/brainsci11020217), 2021-02-10
Supplement: brainsci-11-00217-s001.pdf [file brainsci-11-00217-s001.pdf]

Each study included in the Review (Table 1) was scored on individual items described in Table 3 to describe mainly recording bias. A study was scored 1 on an individual item when information was provided in full, 0.5 if the information was provided but some aspects were inconclusive or not mentioned, and 0 when the study did not provide the information on the item. Scores were further summed and a study with a total score of 5 and above was regarded as having a low risk of bias. Results of scoring are presented in Table 4.

**Table 3.** Description of reporting bias items.

| Bias                                  | Description                                                                                                                                                                                                      |
|---------------------------------------|------------------------------------------------------------------------------------------------------------------------------------------------------------------------------------------------------------------|
| 1 Selection bias                      | Were cases and controls selected appropriately (e.g., appropriate diagnostic criteria or definitions, equal application of exclusion criteria to case and controls, sampling not influenced by exposure status)? |
| 2 Performance bias                    | Did researchers rule out any impact from a concurrent intervention or an unintended exposure that might bias results?                                                                                            |
| 3 Attrition bias                      | If attrition (overall or differential nonresponse, dropout, loss to follow-up, or exclusion of participants) was a concern, were missing data handled appropriately?                                             |
| 4 Detection bias                      | Were variables assessed/defined using valid and reliable measures, implemented consistently across all study participants?                                                                                       |
| 5 Statistical power                   | Was sample size adequate?                                                                                                                                                                                        |
| 6 Paradigm description                | Was the description of the paradigm used provided in full, and replicable (type of paradigm, stimuli characteristics, presentation ratio, inter-stimulus interval, response type)?                               |
| 7 Cognitive variables acknowledgement | Were correlations between cognitive evaluation and ASSR measures discussed and possible reasons attributed?                                                                                                      |

**Table 4.** Risk of reporting bias rating scores. Studies rated as high risk of bias (total score of 5 and less) are highlighted in grey. 0 score - high risk of bias (data on item not given, insufficient); 0.5 – medium risk bias (some data is missing); 1 - low risk of bias (all data is provided).

| Article                      | 1   | 2   | 3 | 4   | 5   | 6 | 7   | TOTAL |
|------------------------------|-----|-----|---|-----|-----|---|-----|-------|
| Arrondo et al. 2009          | 1   | 1   | 1 | 1   | 1   | 1 | 1   | 7     |
| Bartolomeo et al. 2019       | 1   | 1   | 1 | 1   | 0.5 | 0 | 0   | 4.5   |
| Gaskins et al. 2019          | 0   | 0.5 | 1 | 0.5 | 0.5 | 0 | 1   | 3.5   |
| Hirano et al. 2020           | 1   | 1   | 1 | 1   | 1   | 1 | 0   | 6     |
| Hirtum et al. 2019           | 0.5 | 1   | 1 | 1   | 1   | 1 | 1   | 6.5   |
| Kim et al. 2019              | 1   | 1   | 1 | 1   | 1   | 1 | 1   | 7     |
| Kirihara et al. 2012         | 1   | 1   | 1 | 1   | 1   | 1 | 1   | 7     |
| Koshiyama et al. 2020a       | 1   | 1   | 1 | 1   | 1   | 1 | 1   | 7     |
| Koshiyama et al. 2020b       | 1   | 1   | 1 | 1   | 1   | 1 | 1   | 7     |
| Koshiyama et al. 2020c       | 1   | 1   | 1 | 1   | 1   | 1 | 1   | 7     |
| Lehongre et al. 2011         | 0.5 | 0.5 | 1 | 1   | 1   | 1 | 1   | 6     |
| Leonhardt et al. 2019        | 1   | 1   | 1 | 1   | 0.5 | 1 | 1   | 6.5   |
| Light et al. 2006            | 0.5 | 1   | 1 | 1   | 1   | 1 | 1   | 6.5   |
| Murphy et al. 2020           | 1   | 1   | 1 | 1   | 1   | 1 | 0.5 | 6.5   |
| Parčiauskaitė et al. 2019    | 1   | 1   | 1 | 1   | 1   | 1 | 1   | 7     |
| Puvvada et al. 2018          | 1   | 1   | 1 | 1   | 1   | 1 | 1   | 7     |
| Rass et al. 2010             | 1   | 1   | 1 | 1   | 1   | 1 | 0.5 | 6.5   |
| Rass et al. 2012             | 1   | 1   | 1 | 1   | 1   | 1 | 0   | 6     |
| Rojas et al. 2011            | 1   | 0   | 1 | 1   | 1   | 1 | 1   | 6     |
| Sun et al. 2018              | 1   | 1   | 0 | 1   | 1   | 1 | 1   | 6     |
| Tada et al. 2016             | 1   | 1   | 1 | 0.5 | 0.5 | 1 | 1   | 6     |
| van Deursen et al. 2011 [39] | 1   | 1   | 1 | 1   | 0.5 | 1 | 1   | 6.5   |
